# Supplementary material
Source: publisher site journal article supplement (https://www.dovepress.com/article/258471)

Appendix 1. List of original items in English and validated items in Persian


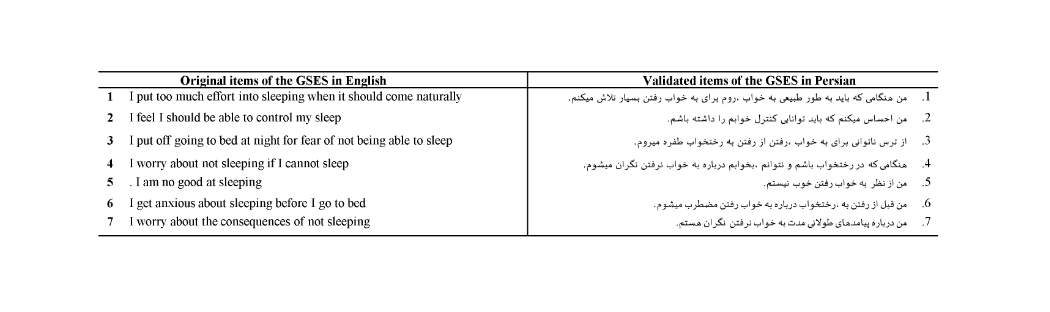

Supplement: Supplementary file 1 [file get_supplementary_file.php]
